# Supplementary material for: SCReadCounts: estimation of cell-level SNVs expression from scRNA-seq data
Source: PubMed Central journal article supplement (PMC8459565; doi:10.1186/s12864-021-07974-8), 2021-09-22
Supplement: 12864_2021_7974_MOESM2_ESM.pdf [file 12864_2021_7974_MOESM2_ESM.pdf]

**SRR10156297**

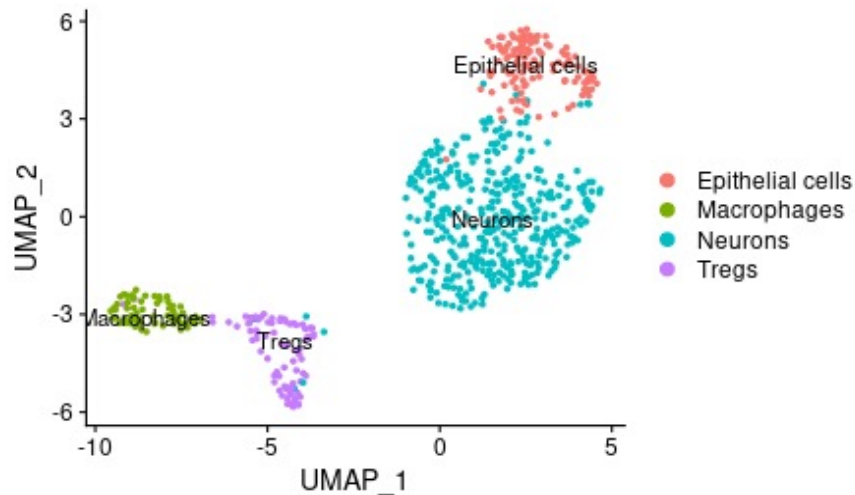

**14:100846310, *MEG3***

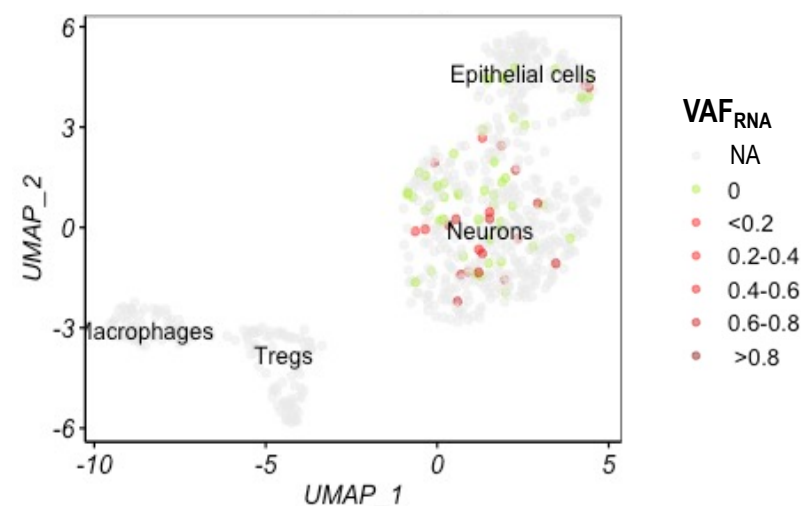

**SRR10156299**

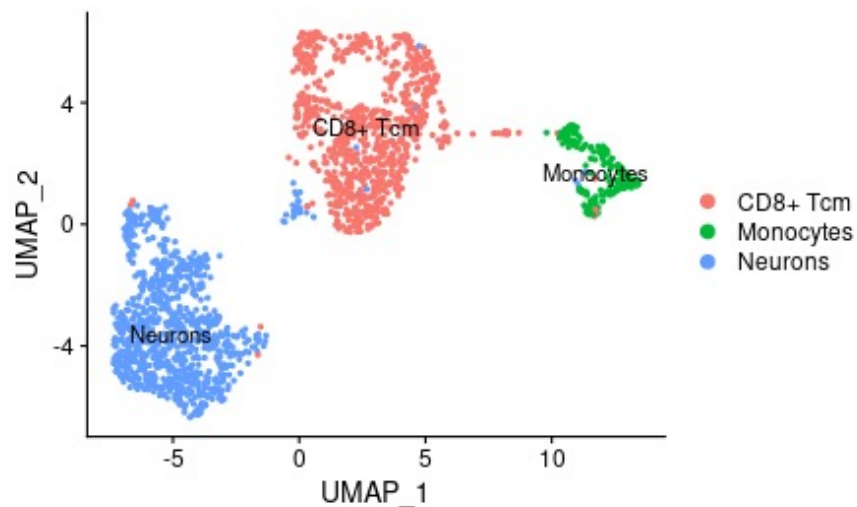

**14:100846310, *MEG3***

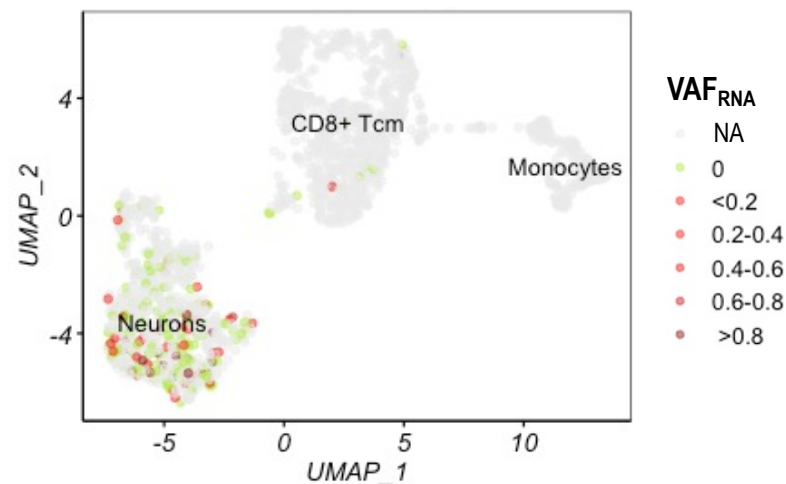

**Supplementary Figure 2.** Two-dimensional UMAP clusters of samples SRR10156297 and SRR10156299 showing cells classified by type (left) and visualizing RNA-editing levels (right) in the gene *MEG3*, where the intensity of the red color corresponds to the proportion of edited reads, and the green color indicates that all the reads (minR=3) covering the position in the cell carried the reference nucleotide.
