# Supplementary material for: SCReadCounts: estimation of cell-level SNVs expression from scRNA-seq data
Source: PubMed Central journal article supplement (PMC8459565; doi:10.1186/s12864-021-07974-8), 2021-09-22
Supplement: 12864_2021_7974_MOESM3_ESM.pdf [file 12864_2021_7974_MOESM3_ESM.pdf]

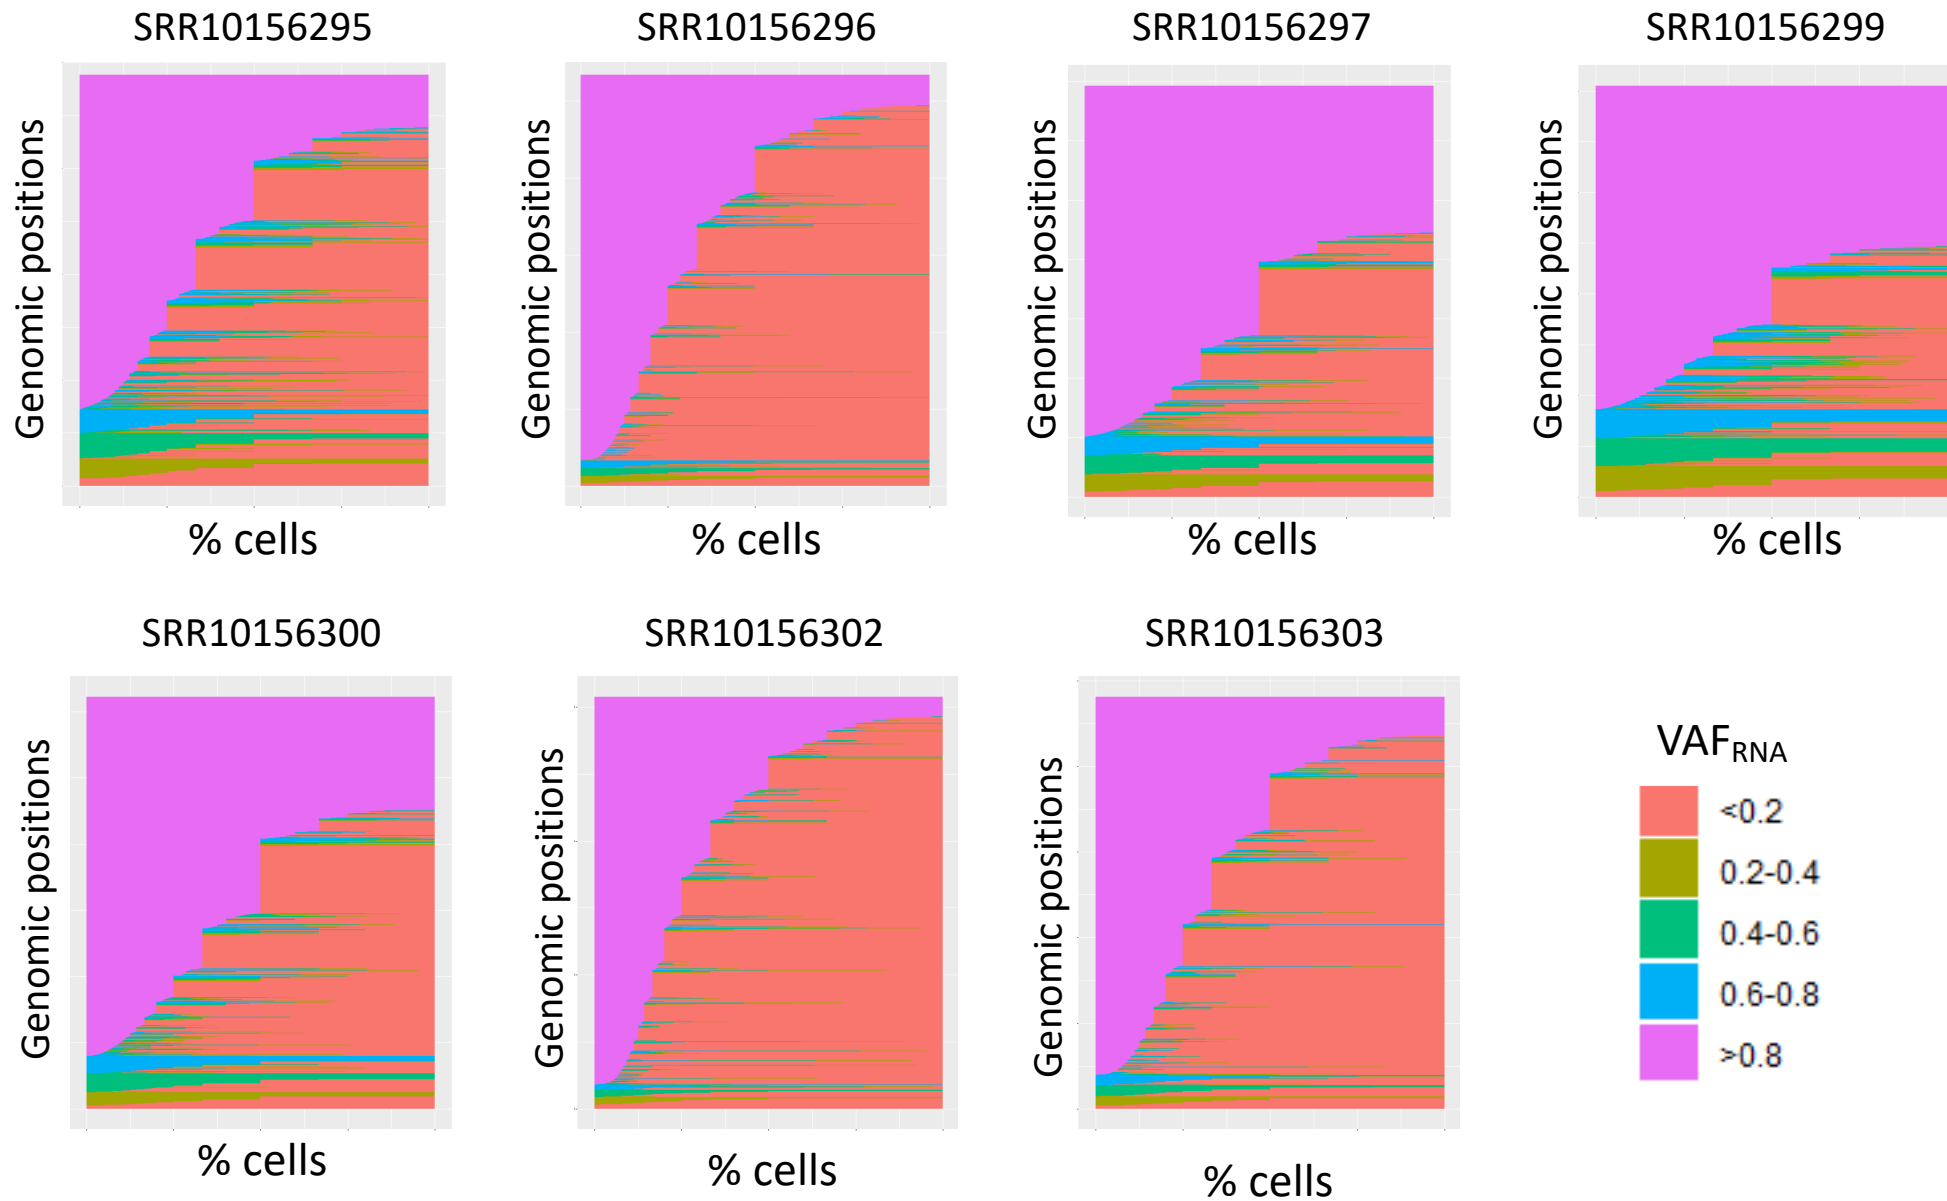

**Supplementary Figure 3.**  $scVAF_{RNA}$  estimated at genomic positions covered by a minimum of 5 sequencing reads ( $minR=5$ ) at the sites with bi-allelic calls (GATK) in the 7 neuroblastoma samples; the positions are sorted by  $VAF_{RNA}$  (y-axis). For the majority of positions,  $VAF_{RNA}$  showed predominantly mono-allelic expression, with a substantial proportion of the  $scVAF_{RNA}$  estimations in the intervals 0-0.2 (orange) and 0.8-1.0 (purple). The percentage of cells with the corresponding  $VAF_{RNA}$  is displayed on the x-axis.
