# Supplementary material for: SCReadCounts: estimation of cell-level SNVs expression from scRNA-seq data
Source: PubMed Central journal article supplement (PMC8459565; doi:10.1186/s12864-021-07974-8), 2021-09-22
Supplement: 12864_2021_7974_MOESM4_ESM.pdf [file 12864_2021_7974_MOESM4_ESM.pdf]

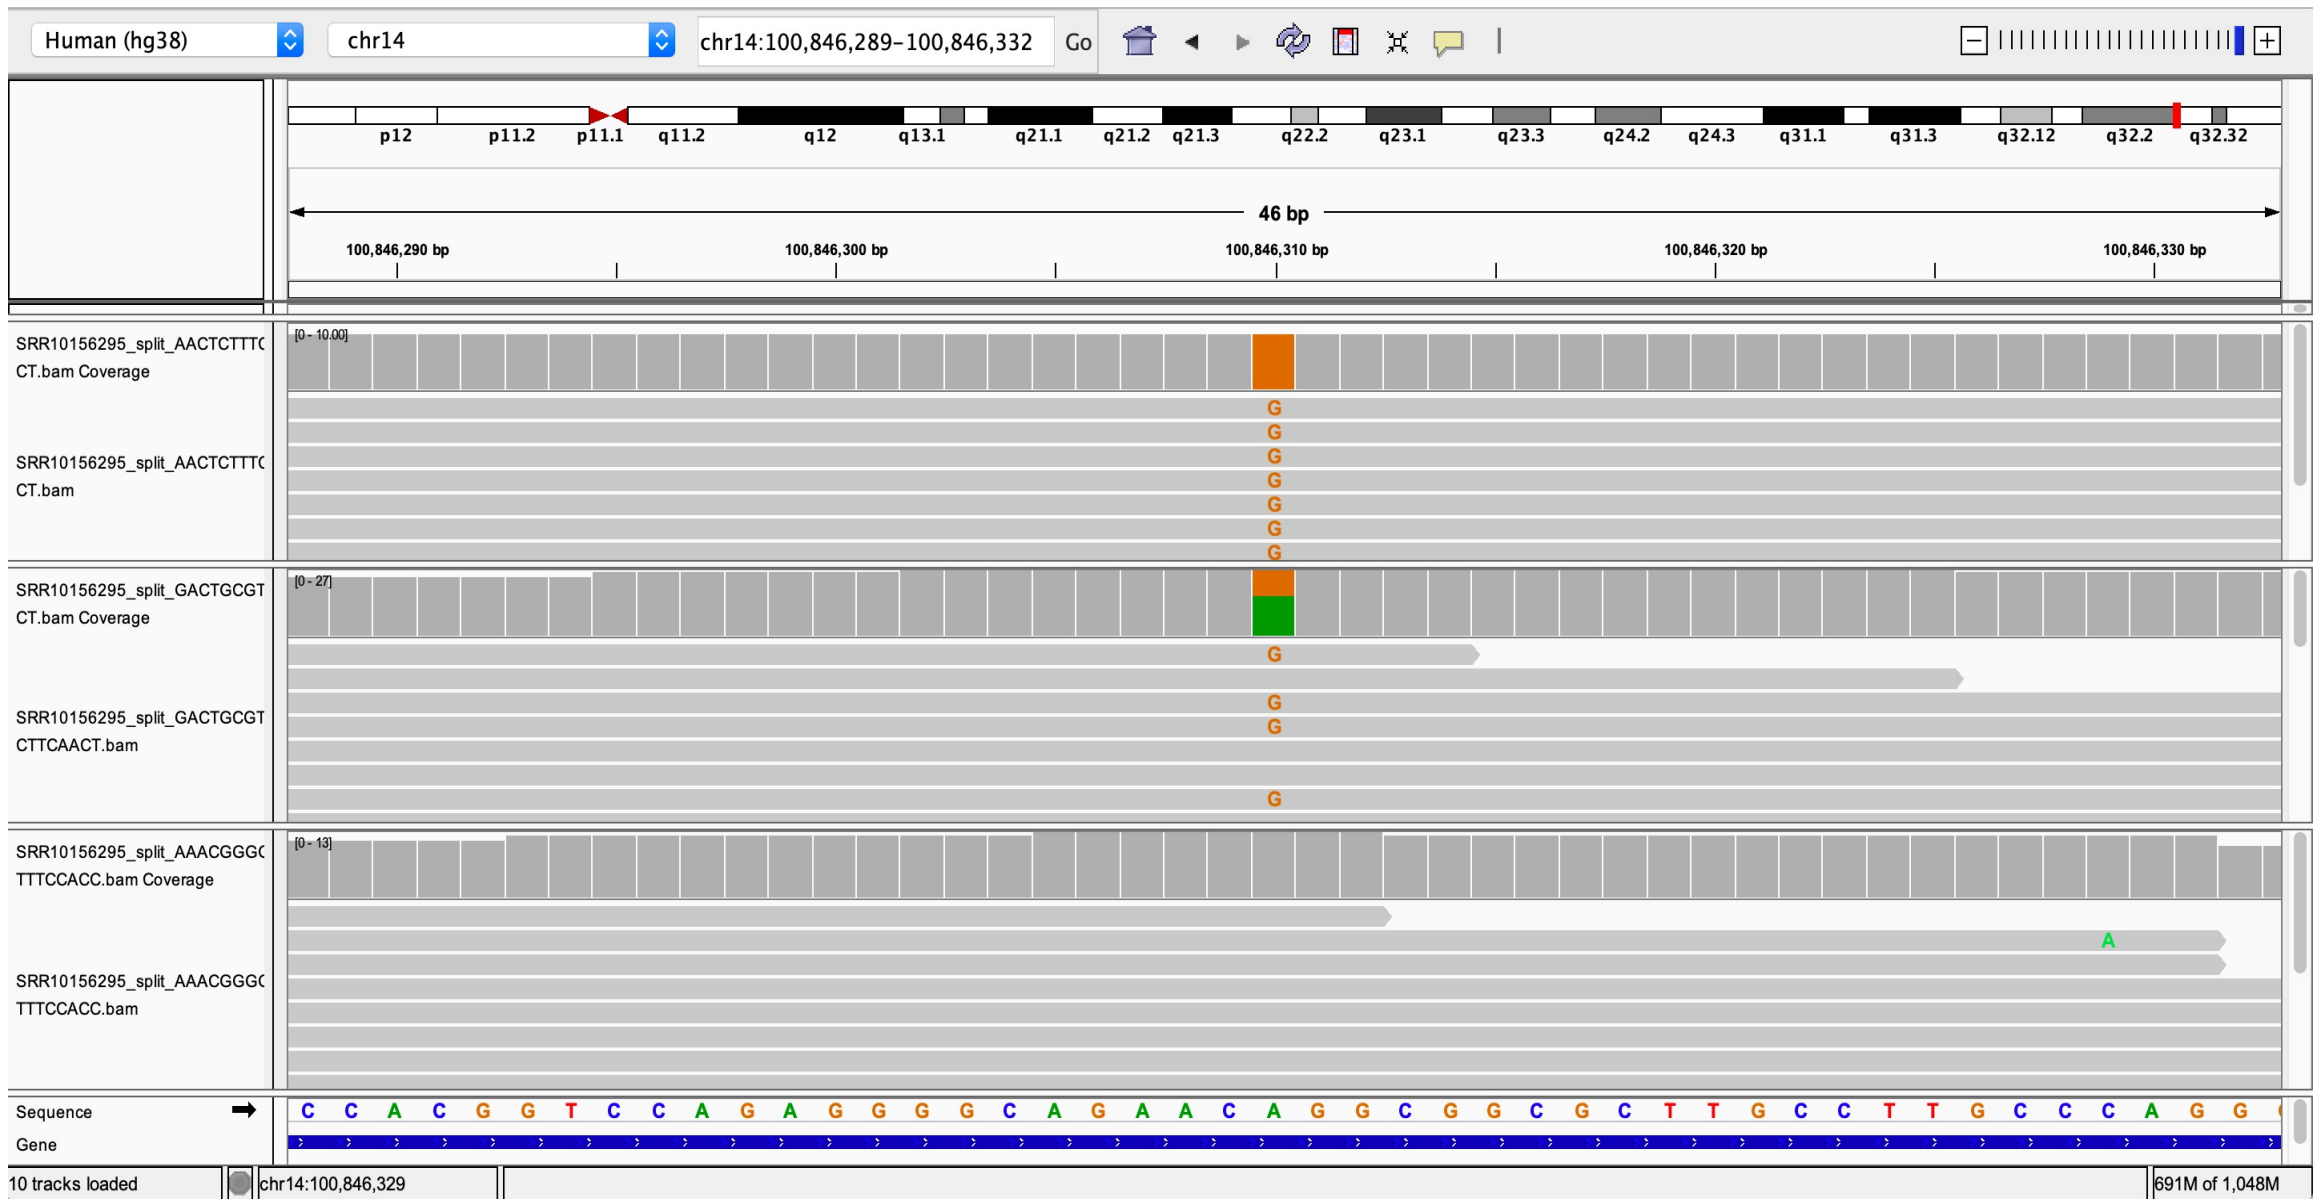

**Supplementary Figure 4.** IGV visualization of variable  $VAF_{RNA}$  of the novel somatic mutation Gly77Gly (12:25227293\_G>A) in the gene *KRAS* in three individual cells of sample SRR10156295.
